# Supplementary material for: Reduction of Doxorubicin-Induced Cardiotoxicity by Co-Administration of Smart Liposomal Doxorubicin and Free Quercetin: In Vitro and In Vivo Studies
Source: MDPI journal article supplement (doi:10.3390/pharmaceutics15071920), 2023-07-11
Supplement: s1 [file s1]

## Supporting Information (SI)

# Reduction of Doxorubicin-Induced Cardiotoxicity by Co-Administration of Smart Liposomal Doxorubicin and Free Quercetin: In Vitro and In Vivo Studies

Hamidreza Dorostkar <sup>1</sup>, Bibi Fatemeh Haghirsadat <sup>2,3</sup>, Mahdie Hemati <sup>1,3</sup>, Fatemeh Safari <sup>4,5</sup>, Azam Hassanpour <sup>6</sup>, Seyed Morteza Naghib <sup>7,8</sup>, Mohammad Hossein Roozbahani <sup>9</sup>, M. R. Mozafari <sup>10</sup> and Ali Moradi <sup>1,\*</sup>

<sup>1</sup> Department of Clinical Biochemistry, Faculty of Medicine, Shahid Sadoughi University of Medical Sciences, Yazd 8916877391, Iran; hr.dorostkar@yahoo.com (H.D.); m.hemati1420@gmail.com (M.H.)

<sup>2</sup> Department of Advanced Medical Sciences and Technologies, Faculty of Paramedicine, Shahid Sadoughi University of Medical Sciences, Yazd 8916877391, Iran; fhaghirsadat@gmail.com

<sup>3</sup> Medical Nanotechnology and Tissue Engineering Research Center, Yazd Reproductive Sciences Institute, Shahid Sadoughi University of Medical Sciences, Yazd 8916877391, Iran

<sup>4</sup> Department of Physiology, Faculty of Medicine, Shahid Sadoughi University of Medical Sciences, Yazd 8916877391, Iran; fa.cardio@gmail.com

<sup>5</sup> Cardiovascular Research Center, Shahid Sadoughi University of Medical Sciences, Yazd 8916877391, Iran

<sup>6</sup> Department of Anatomical Sciences, Faculty of Medicine, Shahid Sadoughi University of Medical Sciences, Yazd 8916877391, Iran; azamhassanpour63@yahoo.com

<sup>7</sup> Nanotechnology Department, School of Advanced Technologies, Iran University of Science and Technology, Tehran 16846-13114, Iran; naghib@iust.ac.ir

<sup>8</sup> Biomaterials and Tissue Engineering Department, Breast Cancer Research Center, Motamed Cancer Institute, IUST, ACECR, Tehran 16846-13114, Iran

<sup>9</sup> School of Advanced Technologies, Iran University of Science & Technology, Tehran 16846-13114, Iran; roozbahani@iust.ac.ir

<sup>10</sup> Australasian Nanoscience and Nanotechnology Initiative (ANNI), Monash University LPO, Clayton, VIC 3168, Australia; dr.m.r.mozafari@gmail.com

\* Correspondence: moradi20018@gmail.com; Tel.: +98-9126706056

The full (uncropped) Western blots given below are presented in full in the following pages of this Supplementary Document.

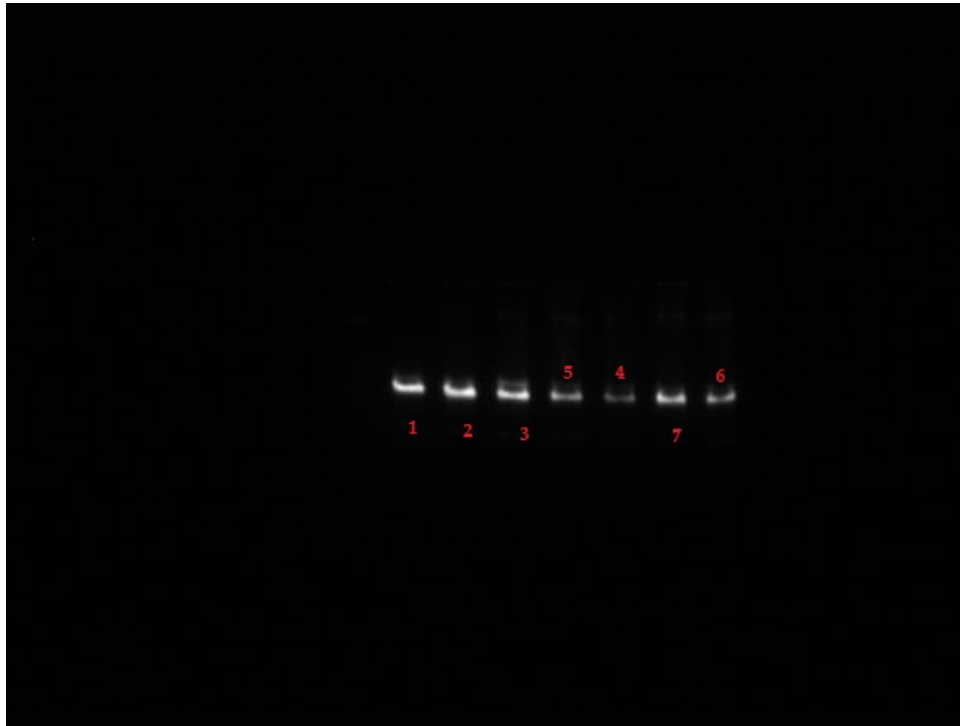

Figure SI.1.a. Western blot bands (Bcl2: ~ 26kDa)

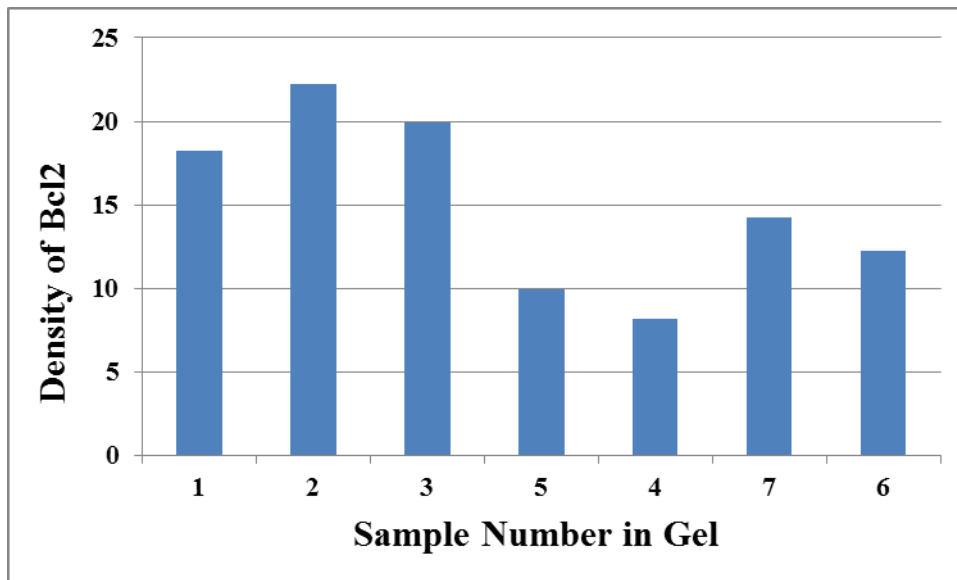

Figure SI.1.b. Densitometry of western blot bands (Bcl2)

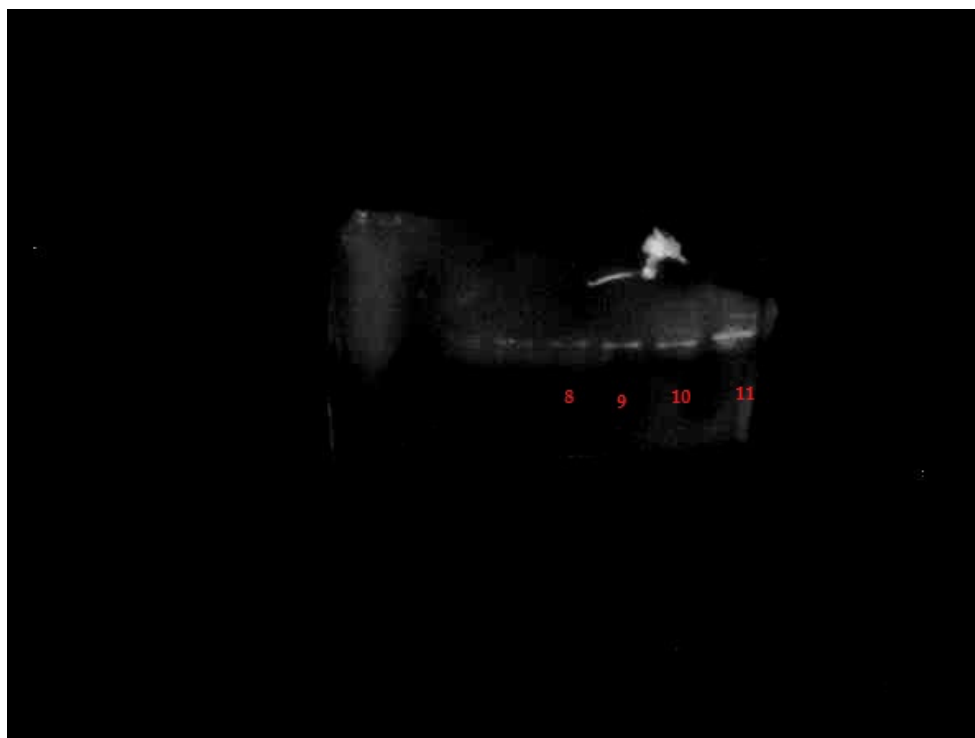

Figure SI.2.a. Western blot bands (NOX1: ~ 65kDa)

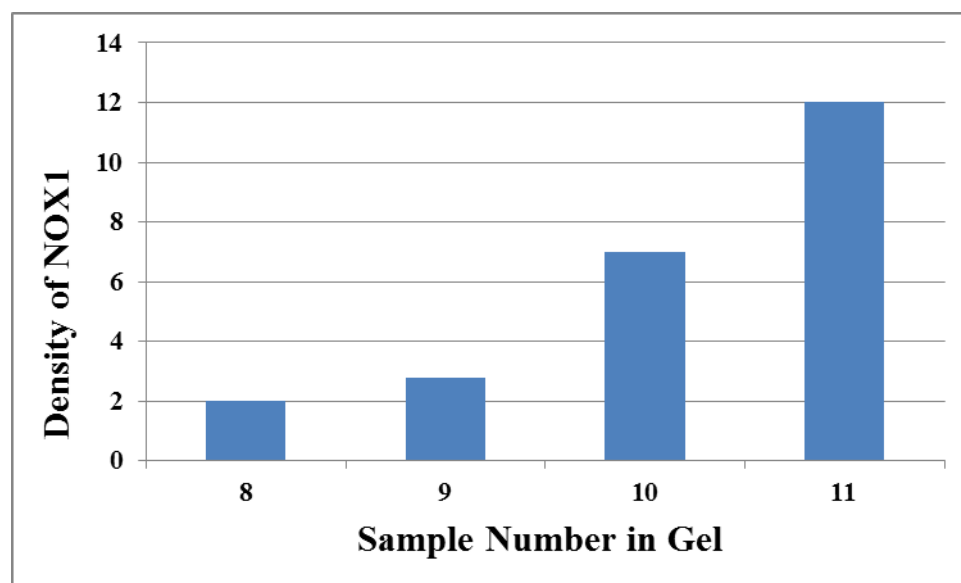

Figure SI.2.b. Densitometry of western blot bands (NOX1)

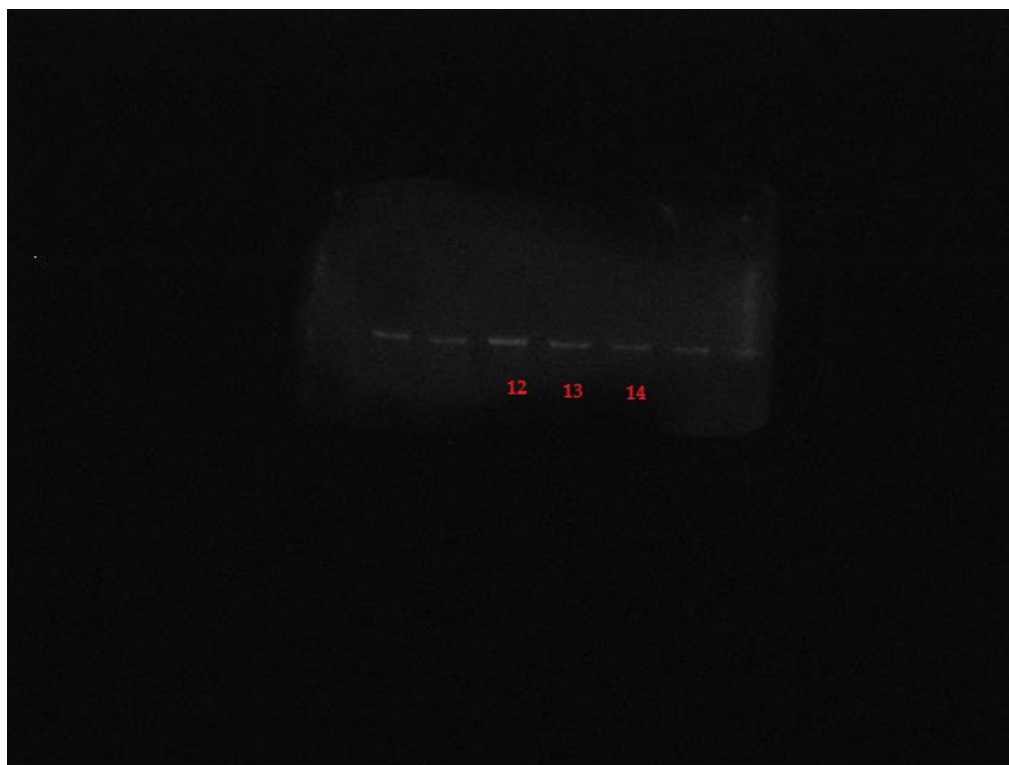

Figure SI.3.a. Western blot bands (NOX1: ~ 65kDa)

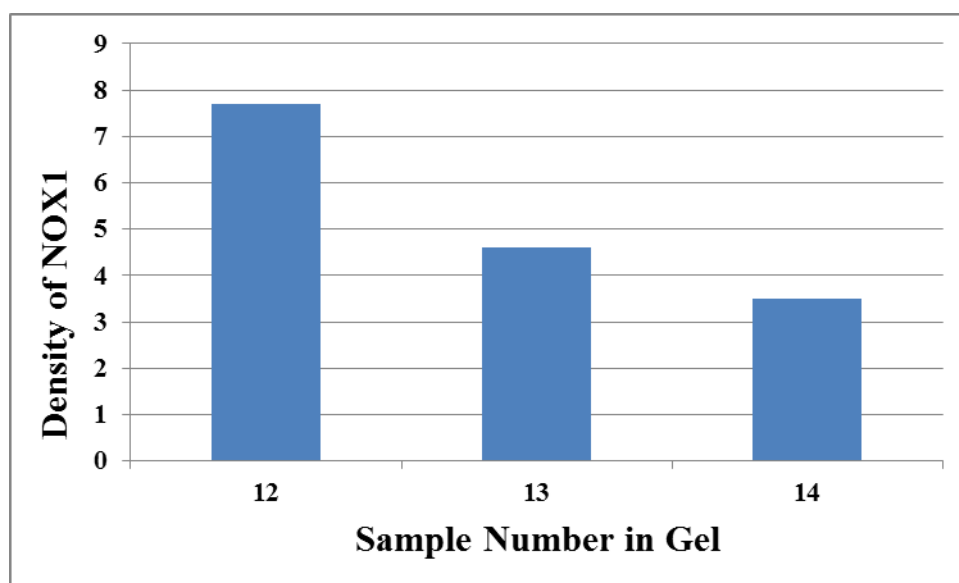

Figure SI.3.b. Densitometry of western blot bands (NOX1)

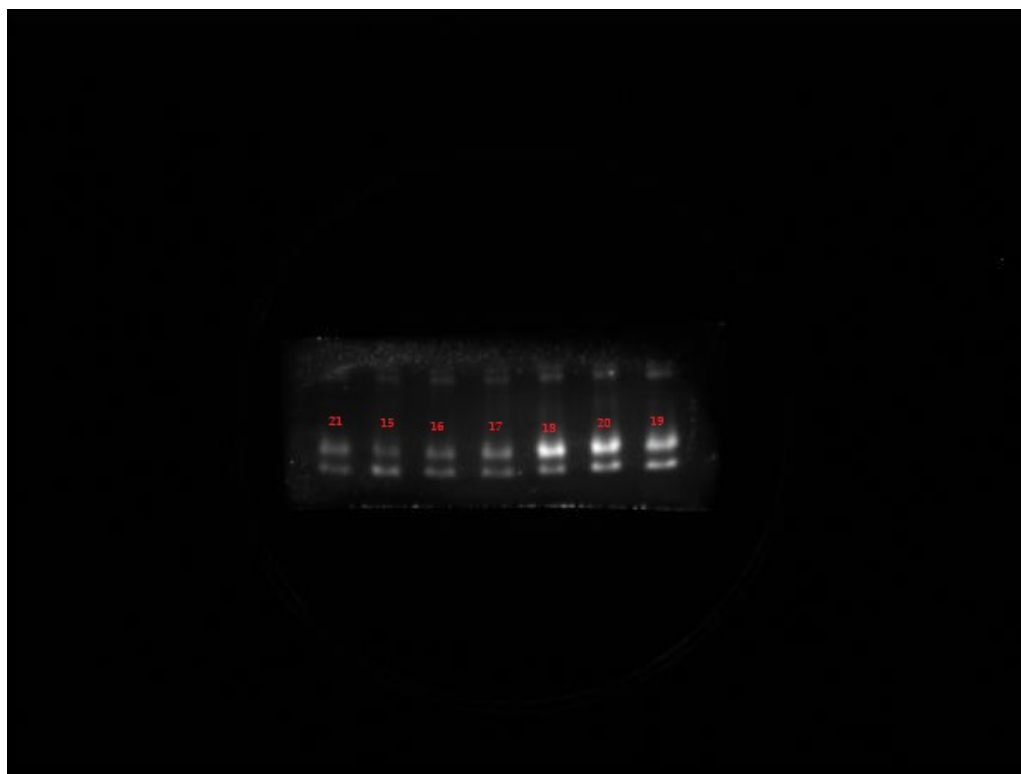

Figure SI.4.a. Western blot bands (Rac1: ~ 21kDa)

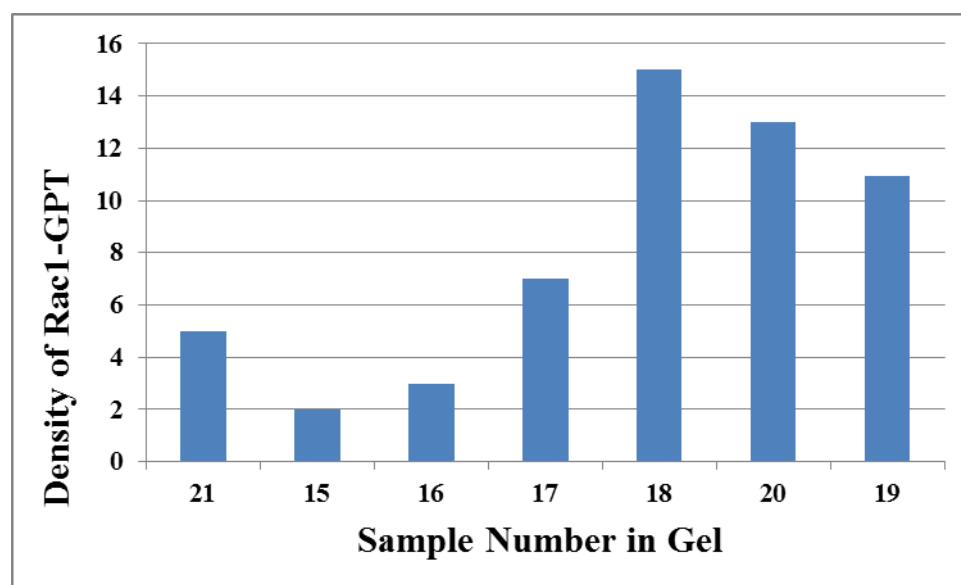

Figure SI.4.b. Densitometry of western blot bands (Rac1)

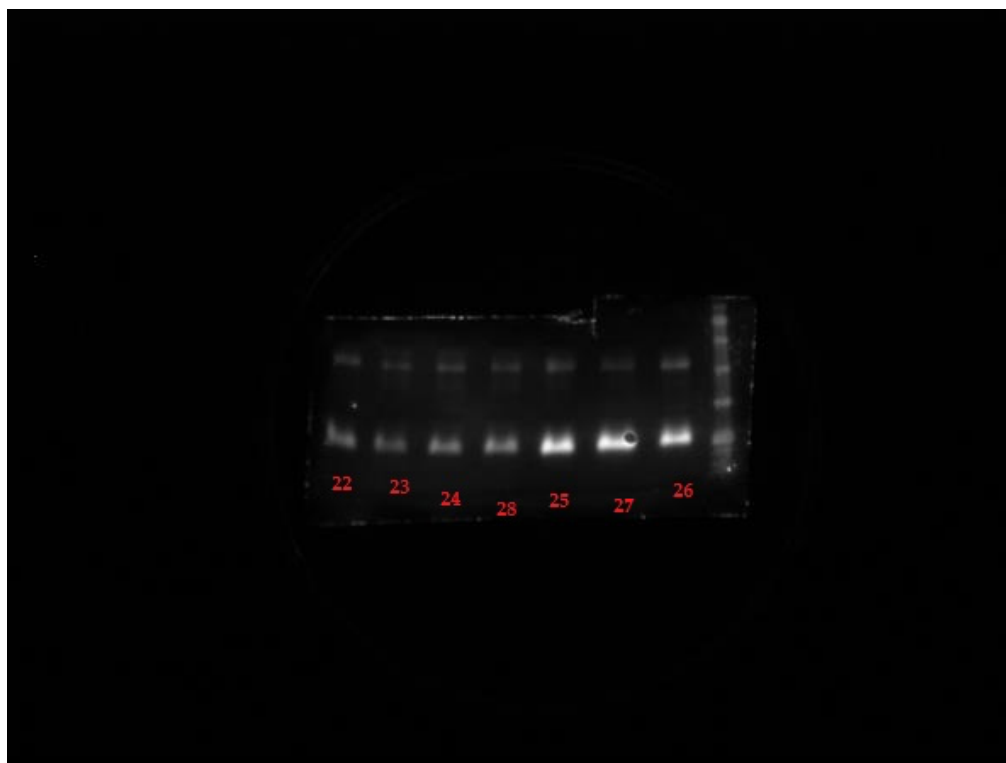

Figure SI.5.a. Western blot bands (Rac1-GTP: ~21kDa)

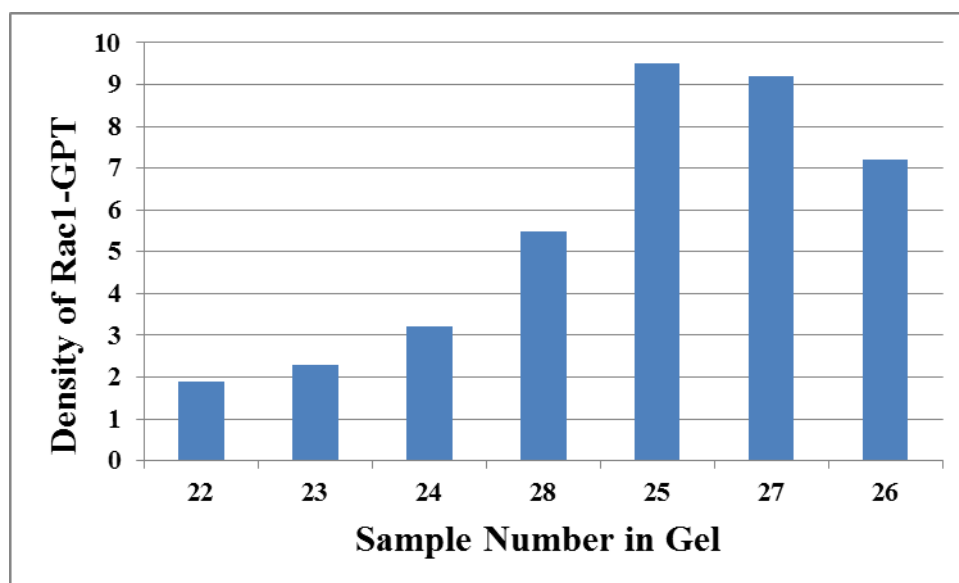

Figure SI.5.b. Densitometry of western blot bands (Rac1-GTP)

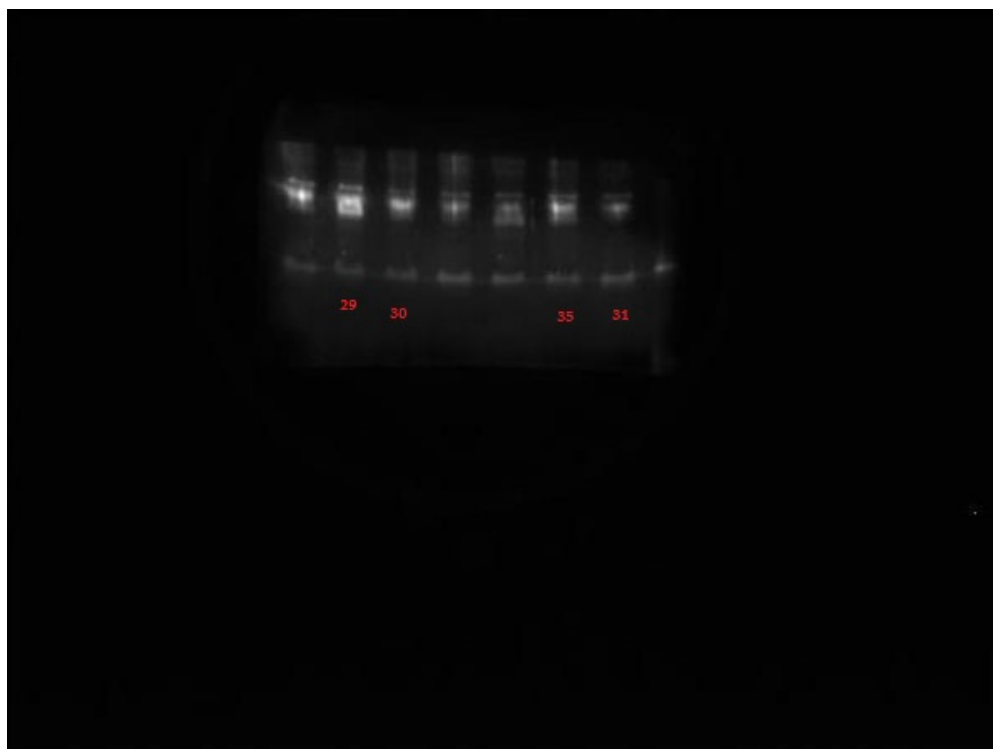

Figure SI.6.a. Western blot bands (SIRT3: ~ 28kDa)

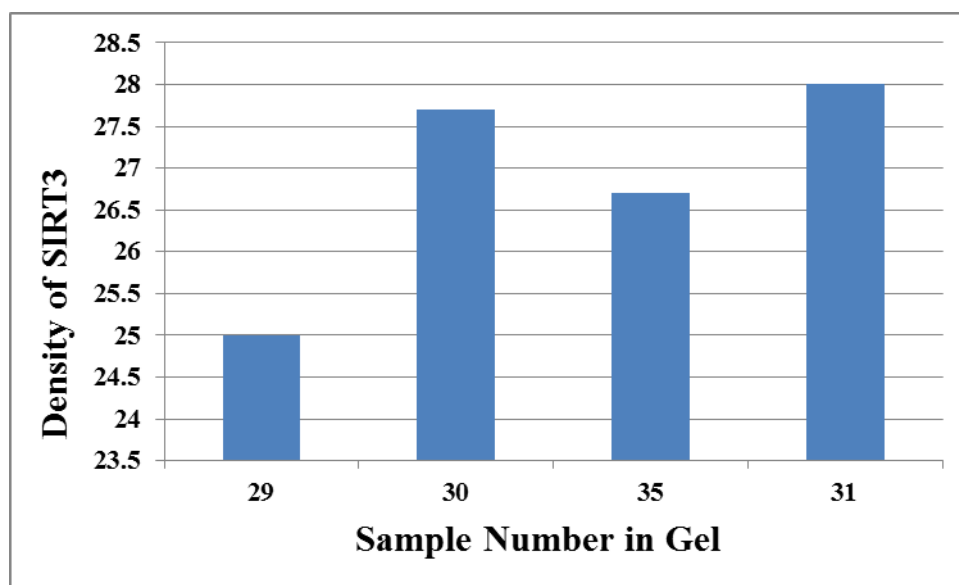

Figure SI.6.b. Densitometry of western blot bands (SIRT3)

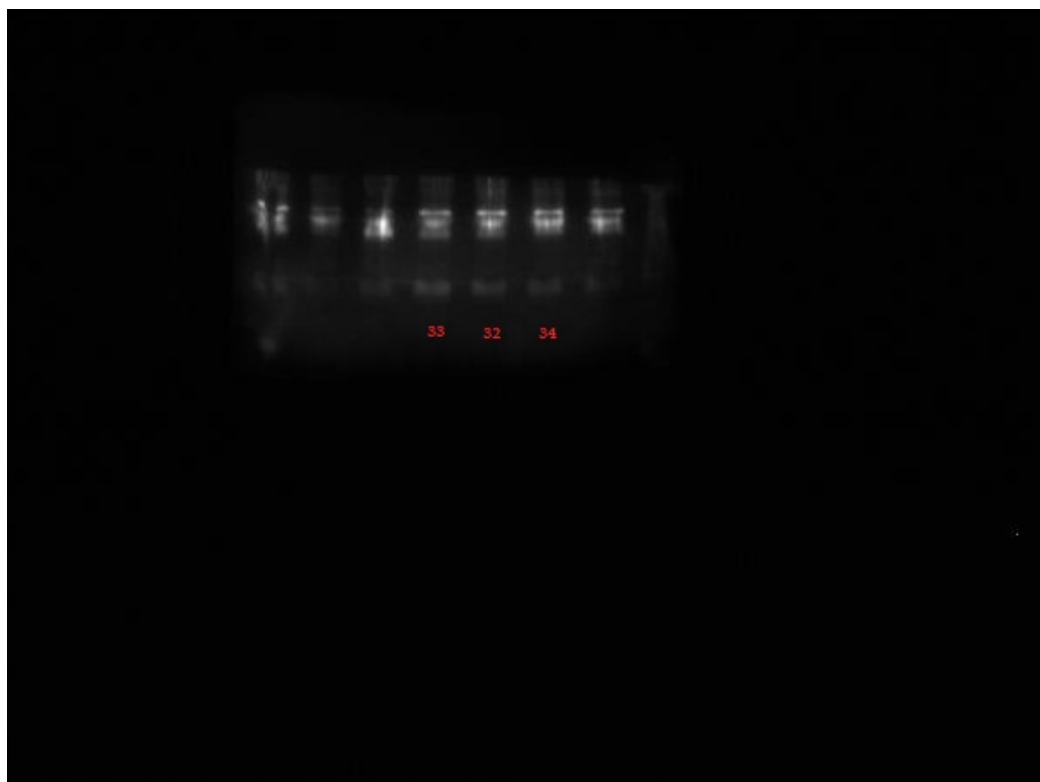

Figure SI.7.a. Western blot bands (SIRT3: ~ 28kDa)

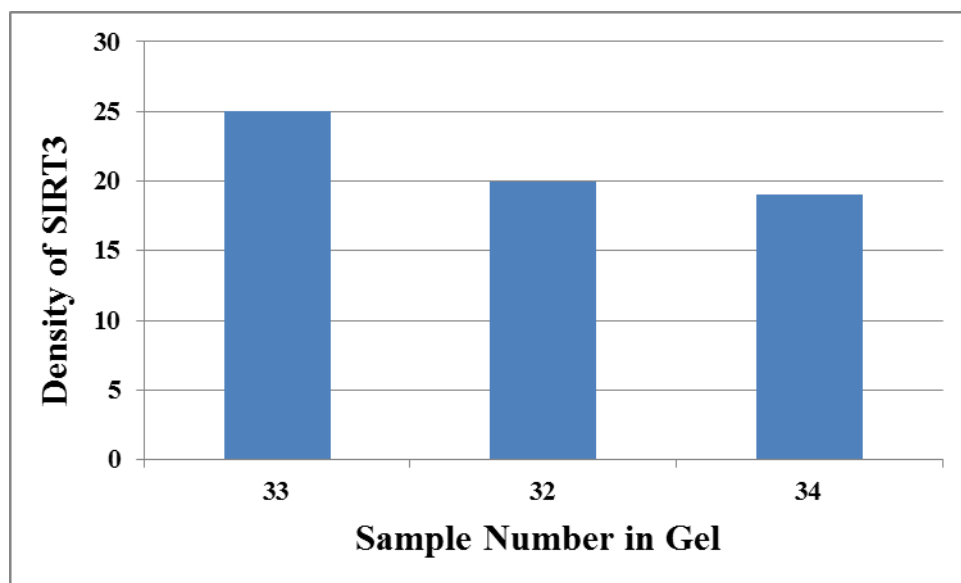

Figure SI.7.b. Densitometry of western blot bands (SIRT3)



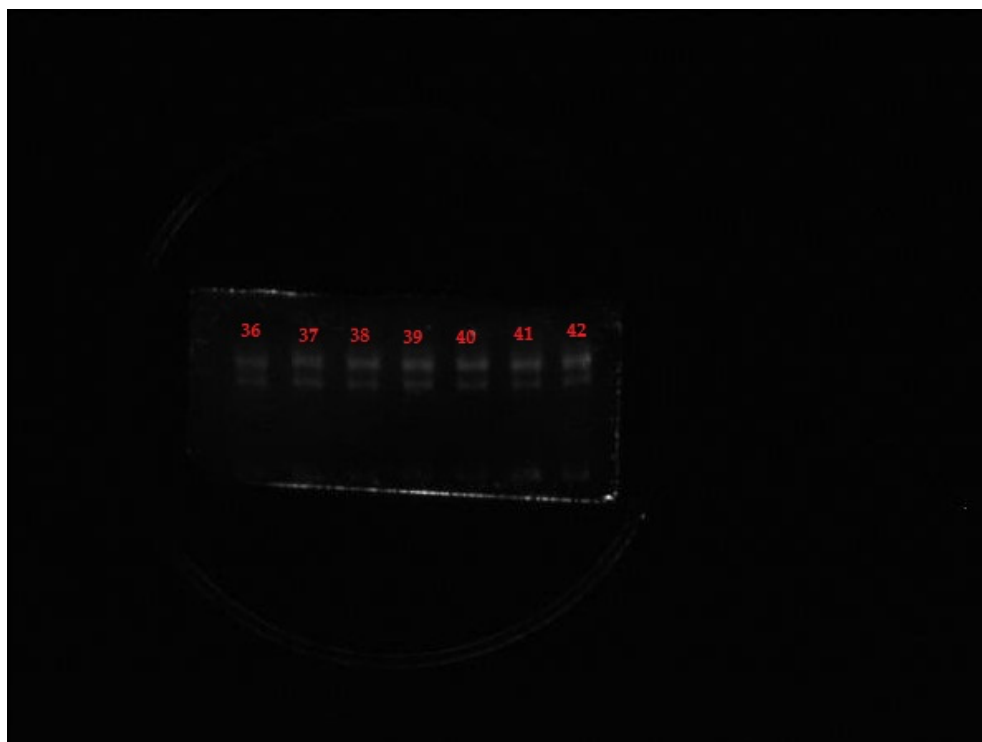

Figure SI.8.a. Western blot bands (b.Actin: ~ 42kDa)

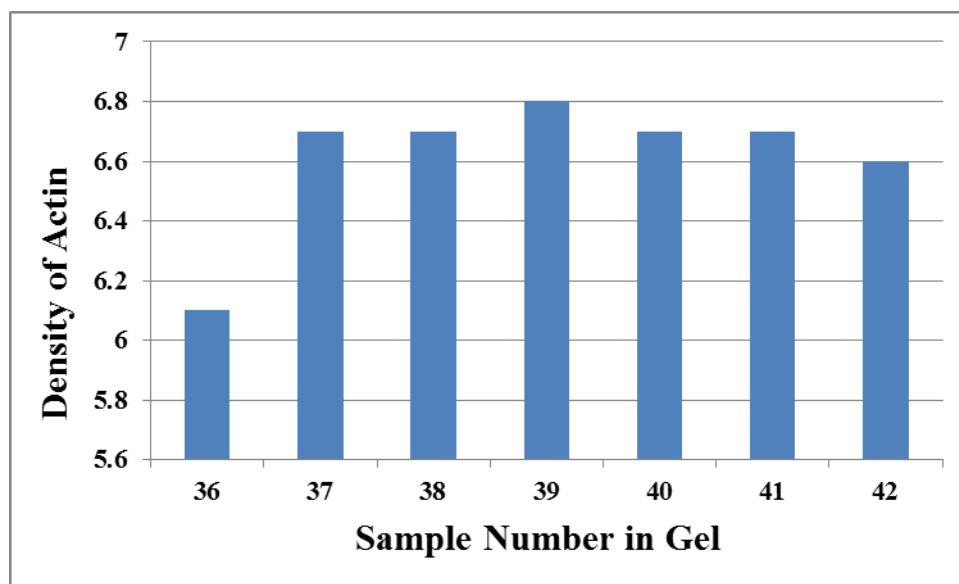

Figure SI.8.b. Densitometry of western blot bands (b.Actin)
